# Supplementary material for: QCM Biosensor Based on Polydopamine Surface for Real-Time Analysis of the Binding Kinetics of Protein-Protein Interactions
Source: MDPI journal article supplement (doi:10.3390/polym9100482), 2017-10-02
Supplement: s1 [file s1]

# Supplementary Materials: QCM biosensor based on polydopamine surface for real-time analysis of the binding kinetics of protein-protein interactions

Chunli Wu, Xueming Li, Siyu Song, Yuxin Pei, Lili Guo and Zhichao Pei

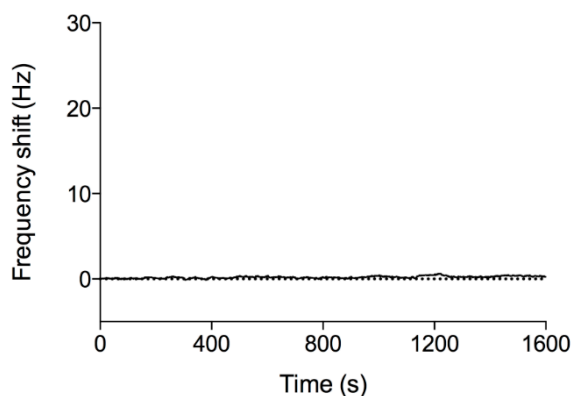

**Figure S1.** The short range term (1600 s) the stability of the quartz oscillator.

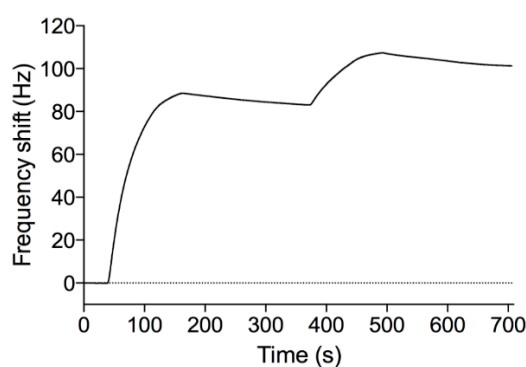

**Figure S2.** The sensorgram of two injections of 100  $\mu\text{g/mL}$  biotinylated Con A on the avidin-FITC surface.

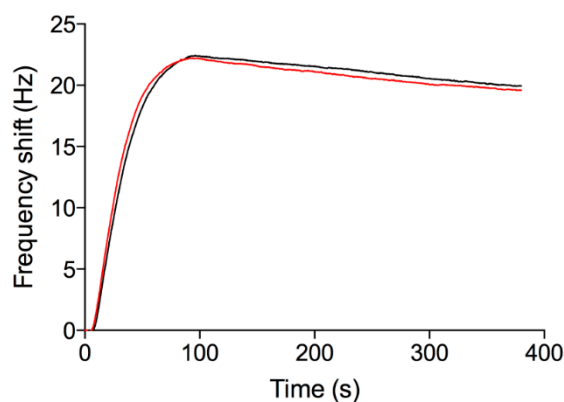

**Figure S3.** The interactions between myoglobin (4  $\mu\text{g/mL}$ ) and anti-myoglobin 7005 antibody without (red line) or in the presence of (black line) BSA (4  $\mu\text{g/mL}$ ).
